# Supplementary material for: Integrative Analysis of miRNA and mRNA Profiles in Response to Ethylene in Rose Petals during Flower Opening
Source: PLoS One. 2013 May 16;8(5):e64290. doi: 10.1371/journal.pone.0064290 (PMC3655976; doi:10.1371/journal.pone.0064290)
Supplement: Table S9 — Comparison of known and novel miRNAs identified by Kim et al and in our study. (XLSX) [file pone.0064290.s010.xlsx]

## Sheet: Sheet1
Table S9. Comparison of known and novel miRNAs identified by Kim et al and in our study.
miRNA family	category	miRNAs identified by Kim et al.	miRNAs identified in our study (> 5RPM)	present in our sRNA database but not identified as miRNA in our study
miR156	Known	Ö	Ö	-
miR157	Known	Ö	Ö	-
miR159	Known	Ö	Ö	-
miR160	Known	Ö	Ö	-
miR162	Known	Ö	Ö	-
miR164	Known	Ö	Ö	-
miR166	Known	Ö	Ö	-
miR167	Known	Ö	Ö	-
miR168	Known	Ö	Ö	-
miR169	Known	Ö	Ö	-
miR171	Known	Ö	Ö	-
miR172	Known	Ö	Ö	-
miR2109	Known	Ö	Ö	-
miR2111	Known	Ö	-	Ö
miR2275	Known	Ö	-	Ö
miR2478	Known	-	Ö	-
miR2911	Known	Ö	-	Ö
miR319	Known	Ö	Ö	-
miR390	Known	Ö	Ö	-
miR393	Known	Ö	Ö	-
miR394	Known	Ö	Ö	-
miR395	Known	Ö	Ö	-
miR396	Known	Ö	Ö	-
miR397	Known	Ö	Ö	-
miR398	Known	Ö	Ö	-
miR399	Known	Ö	Ö	-
miR403	Known	Ö	Ö	-
miR408	Known	Ö	Ö	-
miR4414	Known	Ö	Ö	-
miR477	Known	Ö	Ö	-
miR482	Known	Ö	Ö	-
miR5072	Known	-	Ö	-
miR5077	Known	-	Ö	-
miR5139	Known	-	Ö	-
miR530	Known	Ö	-	-
miR535	Known	Ö	Ö	-
miR827	Known	Ö	Ö	-
miR828	Known	Ö	-	Ö
miR845	Known	Ö	-	Ö
miR858	Known	Ö	Ö	-
miR894	Known	Ö	-	-
ng1	novel	Ö	-	Ö
ng2	novel	Ö	-	-
ng3	novel	Ö	-	-
ng4/rhy-miRC10	novel	Ö	Ö	-
ng5	novel	Ö	-	Ö
ng6/rhy-miRC36	novel	Ö	Ö	-
ng7	novel	Ö	-	-
ng8/rhy-miRC24	novel	Ö	Ö	-
ng9/rhy-miRC4	novel	Ö	Ö	-
ng10	novel	Ö	-	-
ng11/rhy-miRC27	novel	Ö	Ö	-
ng12	novel	Ö	-	Ö
ng13	novel	Ö	-	Ö
ng14	novel	Ö	-	Ö
ng15	novel	Ö	-	Ö
ng16	novel	Ö	-	Ö
ng17	novel	Ö	-	-
rhy-miRC1	novel	-	Ö	-
rhy-miRC2	novel	-	Ö	-
rhy-miRC3	novel	-	Ö	-
rhy-miRC4/ng9	novel	Ö	Ö	-
rhy-miRC5	novel	-	Ö	-
rhy-miRC6	novel	-	Ö	-
rhy-miRC7	novel	-	Ö	-
rhy-miRC8	novel	-	Ö	-
rhy-miRC9	novel	-	Ö	-
rhy-miRC10/ng4	novel	Ö	Ö	-
rhy-miRC11	novel	-	Ö	-
rhy-miRC12	novel	-	Ö	-
rhy-miRC13	novel	-	Ö	-
rhy-miRC14	novel	-	Ö	-
rhy-miRC15	novel	-	Ö	-
rhy-miRC16	novel	-	Ö	-
rhy-miRC17	novel	-	Ö	-
rhy-miRC18	novel	-	Ö	-
rhy-miRC19	novel	-	Ö	-
rhy-miRC20	novel	-	Ö	-
rhy-miRC21	novel	-	Ö	-
rhy-miRC22	novel	-	Ö	-
rhy-miRC23	novel	-	Ö	-
rhy-miRC24/ng8	novel	Ö	Ö	-
rhy-miRC25	novel	-	Ö	-
rhy-miRC26	novel	-	Ö	-
rhy-miRC27/ng11	novel	Ö	Ö	-
rhy-miRC28	novel	-	Ö	-
rhy-miRC29	novel	-	Ö	-
rhy-miRC30	novel	-	Ö	-
rhy-miRC31	novel	-	Ö	-
rhy-miRC32	novel	-	Ö	-
rhy-miRC33	novel	-	Ö	-
rhy-miRC34	novel	-	Ö	-
rhy-miRC35	novel	-	Ö	-
rhy-miRC36/ng6	novel	Ö	Ö	-
rhy-miRC37	novel	-	Ö	-
rhy-miRC38	novel	-	Ö	-
rhy-miRC39	novel	-	Ö	-
rhy-miRC40	novel	-	Ö	-
rhy-miRC41	novel	-	Ö	-
rhy-miRC42	novel	-	Ö	-
rhy-miRC43	novel	-	Ö	-
rhy-miRC44	novel	-	Ö	-
rhy-miRC45	novel	-	Ö	-
rhy-miRC46	novel	-	Ö	-
rhy-miRC47	novel	-	Ö	-

## Sheet: Sheet2
Table S9 Comparison of known and novel miRNAs identified by Kim et al and in our study
miRNA family	category	miRNAs identified by Kim et al.	miRNAs identified in our study	present in our sRNA database but not identified as miRNA in our study	expression >5 RPM in our sRNA database
ng1	novel	Ö	Ö	Ö	-
ng2	novel	Ö	-	-	-
ng3	novel	Ö	-	-	-
ng4/rhy-miRC10	novel	Ö	Ö	-	Ö
ng5	novel	Ö	Ö	Ö	-
ng6/rhy-miRC36	novel	Ö	Ö	-	Ö
ng7	novel	Ö	-	-	-
ng8/rhy-miRC24	novel	Ö	Ö	-	Ö
ng9/rhy-miRC4	novel	Ö	Ö	-	Ö
ng10	novel	Ö	-	-	-
ng11/rhy-miRC27	novel	Ö	Ö	-	Ö
ng12	novel	Ö	Ö	Ö	-
ng13	novel	Ö	Ö	Ö	-
ng14	novel	Ö	Ö	Ö	-
ng15	novel	Ö	Ö	Ö	-
ng16	novel	Ö	Ö	Ö	-
ng17	novel	Ö	-	-	-
rhy-miRC1	novel	-	Ö	-	Ö
rhy-miRC2	novel	-	Ö	-	Ö
rhy-miRC3	novel	-	Ö	-	Ö
rhy-miRC4/ng9	novel	Ö	Ö	-	Ö
rhy-miRC5	novel	-	Ö	-	Ö
rhy-miRC6	novel	-	Ö	-	Ö
rhy-miRC7	novel	-	Ö	-	Ö
rhy-miRC8	novel	-	Ö	-	Ö
rhy-miRC9	novel	-	Ö	-	Ö
rhy-miRC10/ng4	novel	Ö	Ö	-	Ö
rhy-miRC11	novel	-	Ö	-	Ö
rhy-miRC12	novel	-	Ö	-	Ö
rhy-miRC13	novel	-	Ö	-	Ö
rhy-miRC14	novel	-	Ö	-	Ö
rhy-miRC15	novel	-	Ö	-	Ö
rhy-miRC16	novel	-	Ö	-	Ö
rhy-miRC17	novel	-	Ö	-	Ö
rhy-miRC18	novel	-	Ö	-	Ö
rhy-miRC19	novel	-	Ö	-	Ö
rhy-miRC20	novel	-	Ö	-	Ö
rhy-miRC21	novel	-	Ö	-	Ö
rhy-miRC22	novel	-	Ö	-	Ö
rhy-miRC23	novel	-	Ö	-	Ö
rhy-miRC24/ng8	novel	Ö	Ö	-	Ö
rhy-miRC25	novel	-	Ö	-	Ö
rhy-miRC26	novel	-	Ö	-	Ö
rhy-miRC27/ng11	novel	Ö	Ö	-	Ö
rhy-miRC28	novel	-	Ö	-	Ö
rhy-miRC29	novel	-	Ö	-	Ö
rhy-miRC30	novel	-	Ö	-	Ö
rhy-miRC31	novel	-	Ö	-	Ö
rhy-miRC32	novel	-	Ö	-	Ö
rhy-miRC33	novel	-	Ö	-	Ö
rhy-miRC34	novel	-	Ö	-	Ö
rhy-miRC35	novel	-	Ö	-	Ö
rhy-miRC36/ng6	novel	Ö	Ö	-	Ö
rhy-miRC37	novel	-	Ö	-	Ö
rhy-miRC38	novel	-	Ö	-	Ö
rhy-miRC39	novel	-	Ö	-	Ö
rhy-miRC40	novel	-	Ö	-	Ö
rhy-miRC41	novel	-	Ö	-	Ö
rhy-miRC42	novel	-	Ö	-	Ö
rhy-miRC43	novel	-	Ö	-	Ö
rhy-miRC44	novel	-	Ö	-	Ö
rhy-miRC45	novel	-	Ö	-	Ö
rhy-miRC46	novel	-	Ö	-	Ö
rhy-miRC47	novel	-	Ö	-	Ö
